# Supplementary material for: Combined loss of LAP1B and LAP1C results in an early onset multisystemic nuclear envelopathy
Source: PubMed Central journal article supplement (PMC6363790; doi:10.1038/s41467-019-08493-7), 2019-02-05
Supplement: 41467_2019_8493_MOESM3_ESM.pdf [file 41467_2019_8493_MOESM3_ESM.pdf]

### Supplementary Movie 1.

Time lapse microscopy of wound closing activity of control fibroblasts (well #D2) over a period of 126 hours in the IncuCyte ZOOM™ scratch wound assay.

### Supplementary Movie 2.

Time lapse microscopy of wound closing activity of patient-derived fibroblasts (Patient 1: III-3; well #C4) over a period of 126 hours in the IncuCyte ZOOM™ scratch wound assay.

### Supplementary Movie 3.

Time lapse microscopy of wound closing activity of patient-derived fibroblasts (Patient 2: IV-4; well #C8) over a period of 126 hours in the IncuCyte ZOOM™ scratch wound assay.
